# Supplementary material
Source: Research Square preprint supplement (doi:10.21203/rs.3.rs-9066402/v1)

**Supplementary Table 1.** PCA rotated componet matrix. pCou: p-Coumaric acid, pCouQ: p-coumaroylquinic acid, t-Fer: Ferulic acid , ChlA: Chlorogenic acid, Ecat: (-)-epicathequin , Q3R: Quercetin-3-rutinoside, Cat: (+)-cathequin. Cap: Capsanthin, Zea: Zeaxanthin, α-Car: α-carotene. AAT: Antioxidant activity.


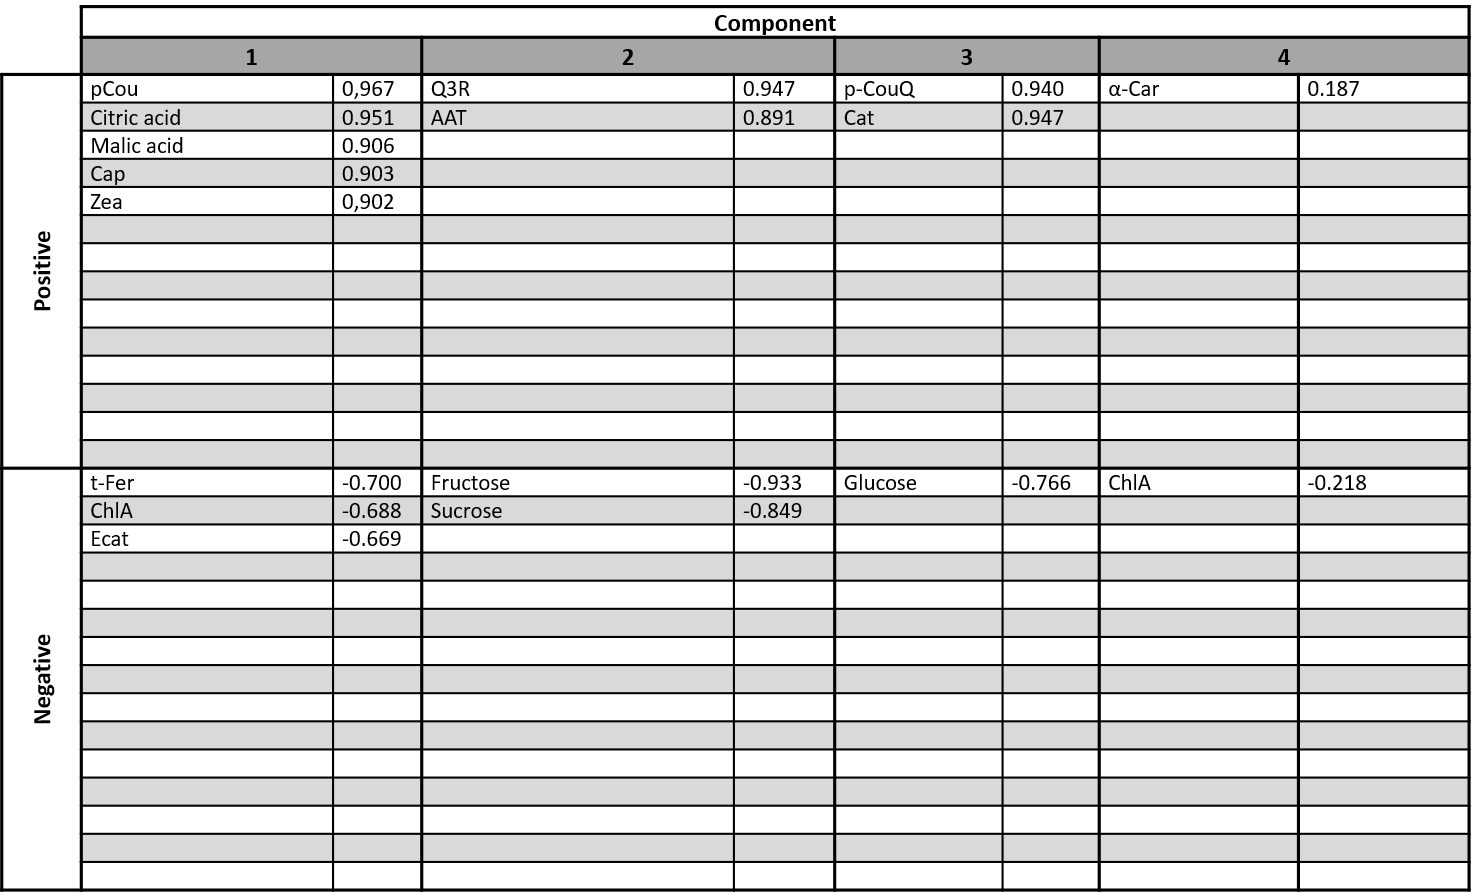

Supplement: Supplementary file 1 [file a8a01f99273e31d17527ce5c.docx]
